# Supplementary material
Source: publisher figshare collection journal article supplement (https://acs.figshare.com/ndownloader/files/3986065)
Supplement: Supplementary file 1 [file 3986065]

# Substrate-integrated hollow waveguides:

## A new level of integration in mid-infrared gas sensing

### Supporting Information

*Andreas Wilk<sup>1</sup>, J. Chance Carter<sup>2</sup>, Michael Chrisp<sup>2</sup>, Anastacia M. Manuel<sup>2</sup>, Paul Mirkarimi<sup>2</sup>, Jennifer B. Alameda<sup>2</sup>, Boris Mizaikoff<sup>d</sup>\**

<sup>1</sup>Institute of Analytical and Bioanalytical Chemistry (IABC), University of Ulm,  
Albert-Einstein-Allee 11, 89081 Ulm, Germany

<sup>2</sup>Lawrence Livermore National Laboratory (LLNL),  
7000 East Avenue, Livermore CA 94550, USA

\*Email: [boris.mizaikoff@uni-ulm.de](mailto:boris.mizaikoff@uni-ulm.de)

**ABSTRACT OF SUPPORT INFORMATION (SI).** The SI contains a scheme of a four-piece iHWG prototype with yin-yang geometry, and depicts its assembly concept. Moreover, an AFM spectrum of a hand-polished surface, and a scheme explaining the radiation propagation within a meandered waveguide is shown. A spectrum of acetic acid is enclosed, followed by an extended list of parameters used for data acquisition. Spectra of various pure analytes diluted to 5000 ppm<sub>v</sub> each are provided, and a trace level spectrum of one of those analytes (butane at 20 ppm<sub>v</sub>). All spectra were obtained with the iHWG prototype discussed in the main article. Finally, the detection limit of butane is estimated.

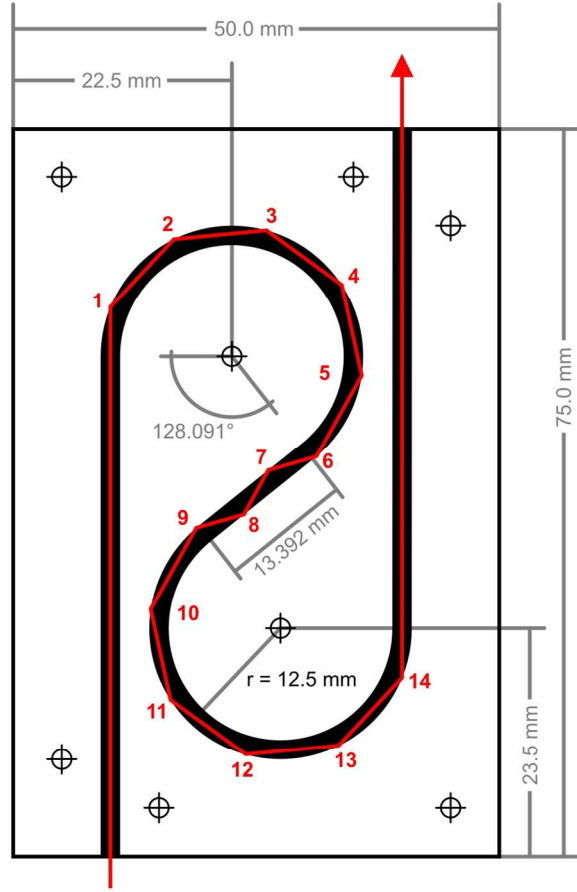

**Figure S-1.** Scheme of the prototype iHWG with substrate dimensions, channel geometry, and modeled propagation path of the center ray (numbers of reflections in red).

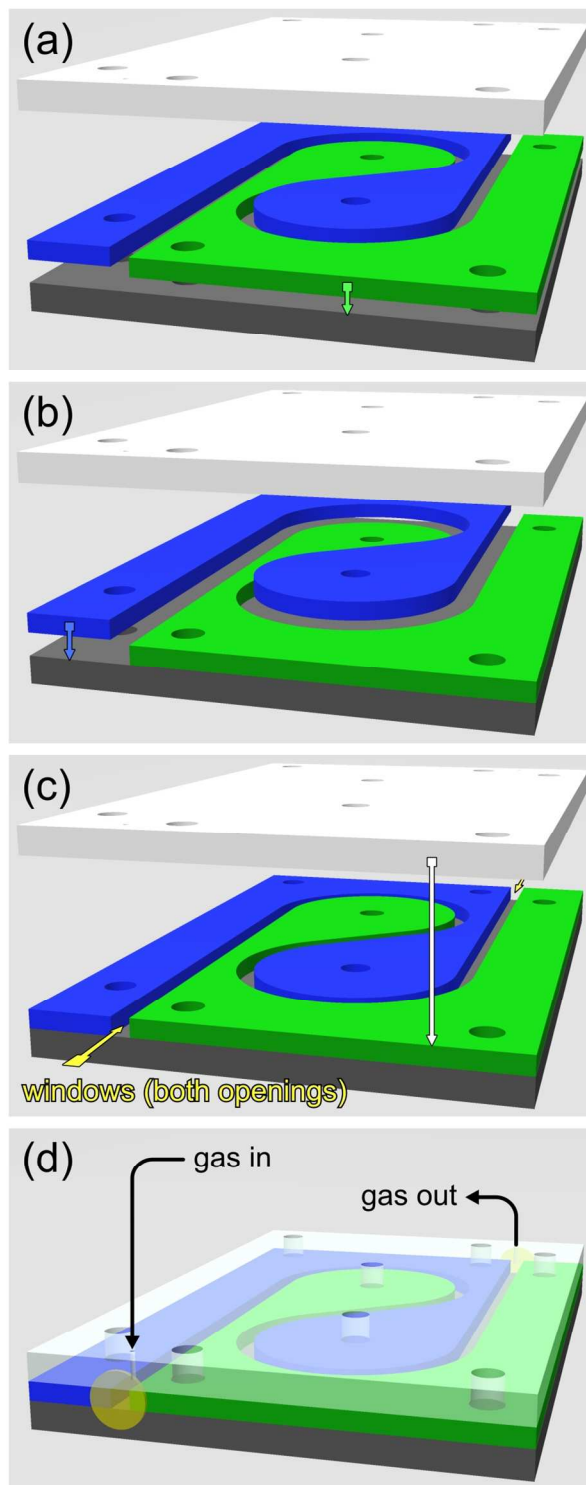

**Figure S-2.** (a-d) iHWG stacked assembly concept showing the top and base plates with internal waveguide sections (blue and green).

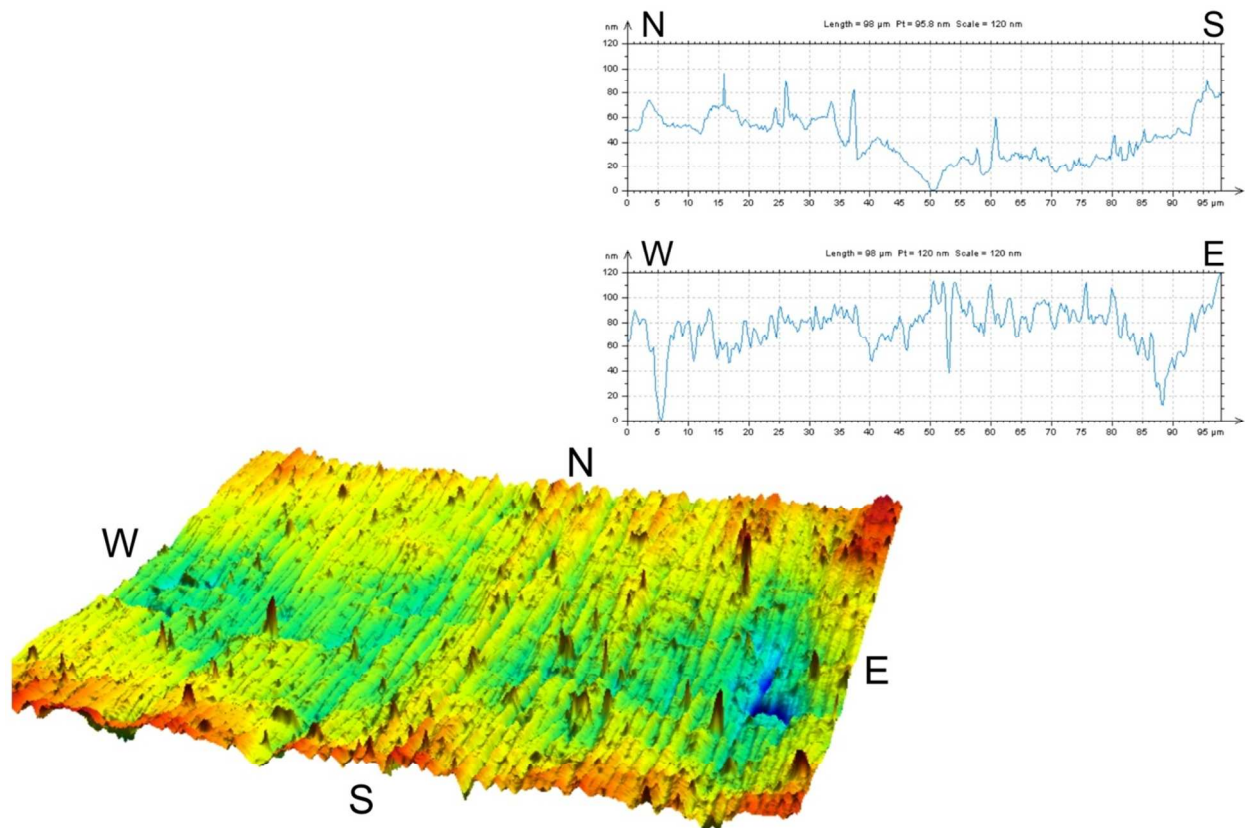

**Figure S-3.** Typical AFM image of a hand-polished surface element, including north/south and west/east cross sectional profiles. The root-mean-squared (RMS) surface roughness of this 98x98  $\mu\text{m}$  area is 33 nm. It should be noted that the RMS value considers both roughness *and* surface flatness (i.e., waviness).

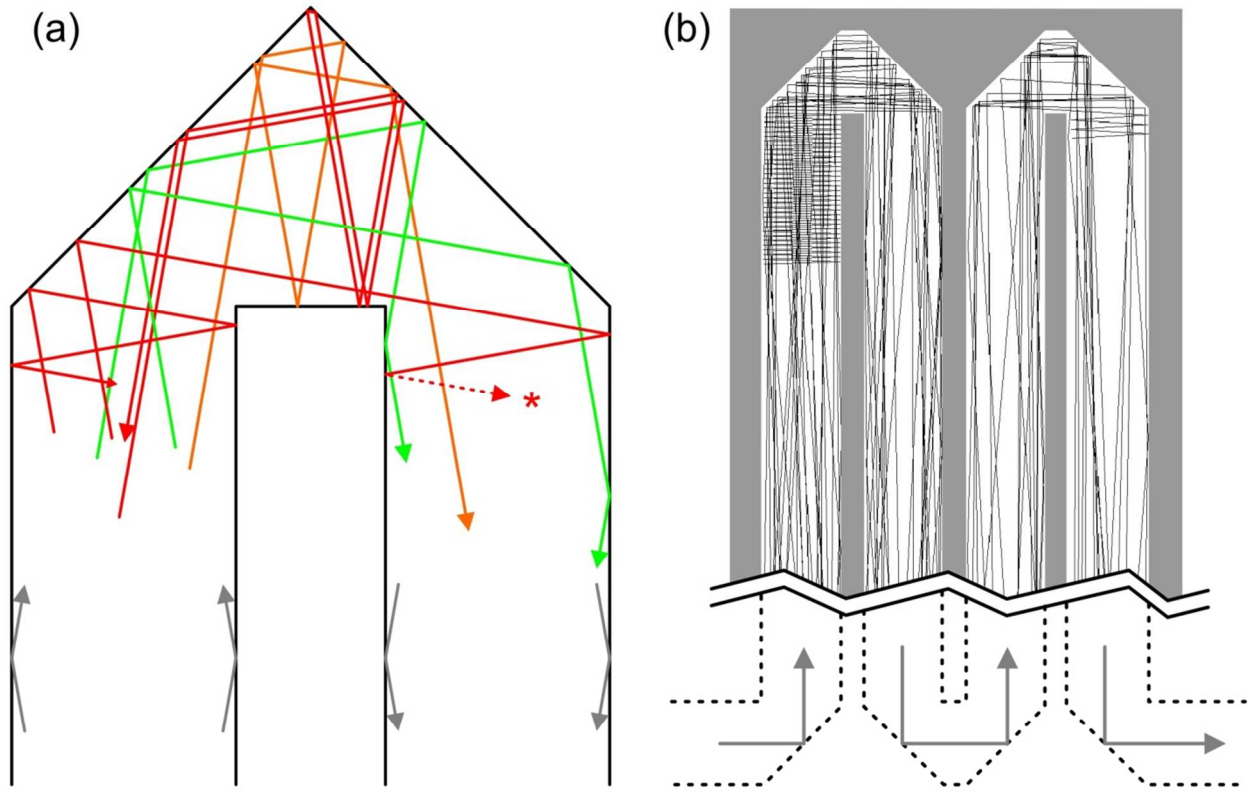

**Figure S-4.** (a) Schematic of 6 sample rays emerging from a non-collimated light source ( $10^\circ$  beam divergence, which is approximately corresponding to the coupling conditions of an OAPM with 2" focal length and 2" effective focal length) propagating through a meandered (serpentine) waveguide channel with intact apex. Green: rays are propagated as desired, i.e. "around the corner"; orange: ray is suffering from multiple reflections, yet, finally successfully propagated; red: rays are either reflected back to the source, or (\*) propagated such that their mean free OPL is significantly decreased. Both situations will cause a decrease in radiation throughput (i.e., geometric loss), as those rays will not reach the detector. (b) Semi-schematic ray tracing of 60 MIR test rays through a gold-coated meandered waveguide channel with flattened apex. Here, the radiation coupled into the device is almost collimated ( $1^\circ$  cone angle). As a consequence, the serpentine structure is quite effective, and geometric losses are significantly reduced. Yet, a single back reflection remains evident in the left meander arm, and one reflection with a shorter mean free OPL is apparent in the right meander arm. Both rays add to the overall attenuation, as they are absorbed rather quickly. Spectrally resolved ray tracing was executed using SPRAY (W. Theiss Hard- and Software, Aachen, Germany).

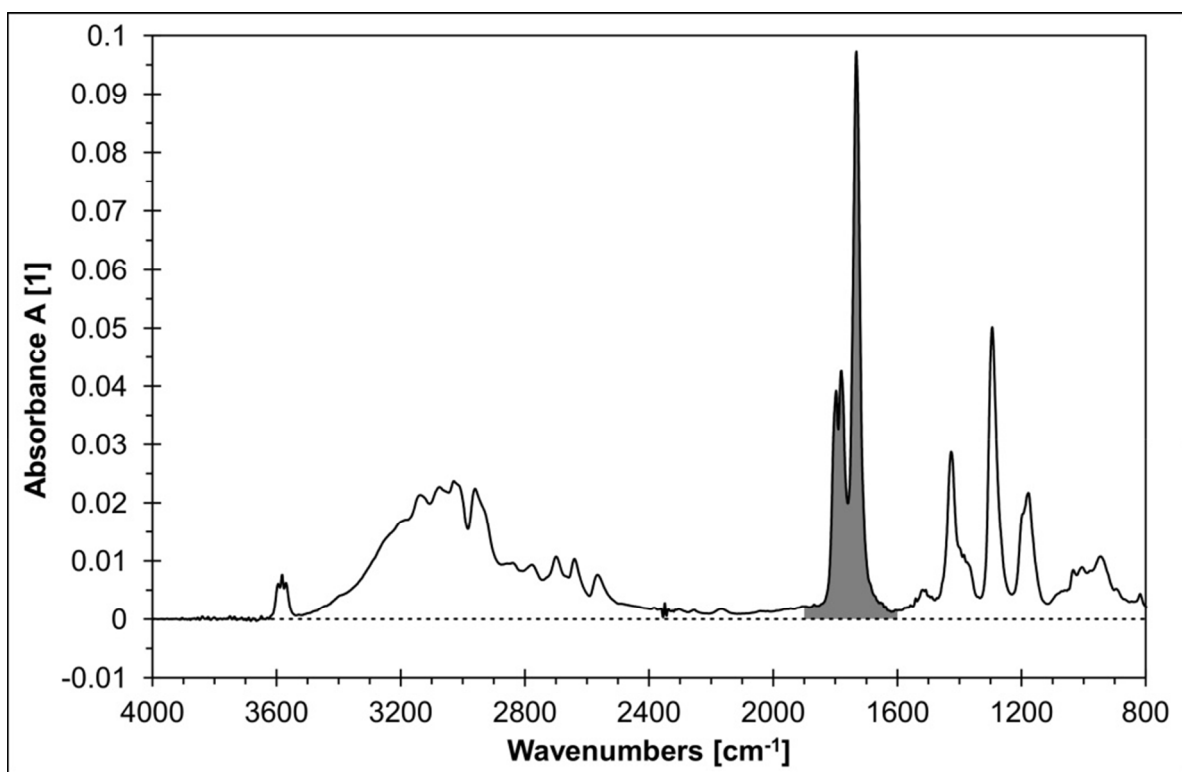

**Figure S-5.** Spectrum of acetic acid; iHWG. Datapoint: 1200s (compare Fig. 3).  
Shaded: Integrated peak area (1600-1900 cm<sup>-1</sup>).

| <b>Data acquisition parameter</b>                | <b>Setting</b>                    |
|--------------------------------------------------|-----------------------------------|
| Spectral resolution [ $\text{cm}^{-1}$ ]         | 2                                 |
| Sample scan time [scans]                         | 100                               |
| Background scan time [scans]                     | 100                               |
| Save data from [ $\text{cm}^{-1}$ ]              | 4000                              |
| Save data to [ $\text{cm}^{-1}$ ]                | 650                               |
| Aperture [mm]                                    | 3                                 |
| Scanner velocity [kHz]                           | 40                                |
| Preamp gain                                      | Reference                         |
| Sample signal gain                               | x1                                |
| Background signal gain                           | x1                                |
| Wanted high frequency limit [ $\text{cm}^{-1}$ ] | 8000                              |
| Wanted low frequency limit [ $\text{cm}^{-1}$ ]  | 0                                 |
| High pass filter                                 | Open                              |
| Low pass filter                                  | Open                              |
| Acquisition mode                                 | Double-sided,<br>forward-backward |
| Correlation mode                                 | Off                               |
| Phase resolution                                 | 8                                 |
| Phase correction mode                            | Mertz                             |
| Apodization function                             | Blackman-Harris 3-term            |
| Zerofilling factor                               | 4                                 |

**Table S-1.** Fundamental spectra acquisition parameters (Bruker OPUS 6.5 software).

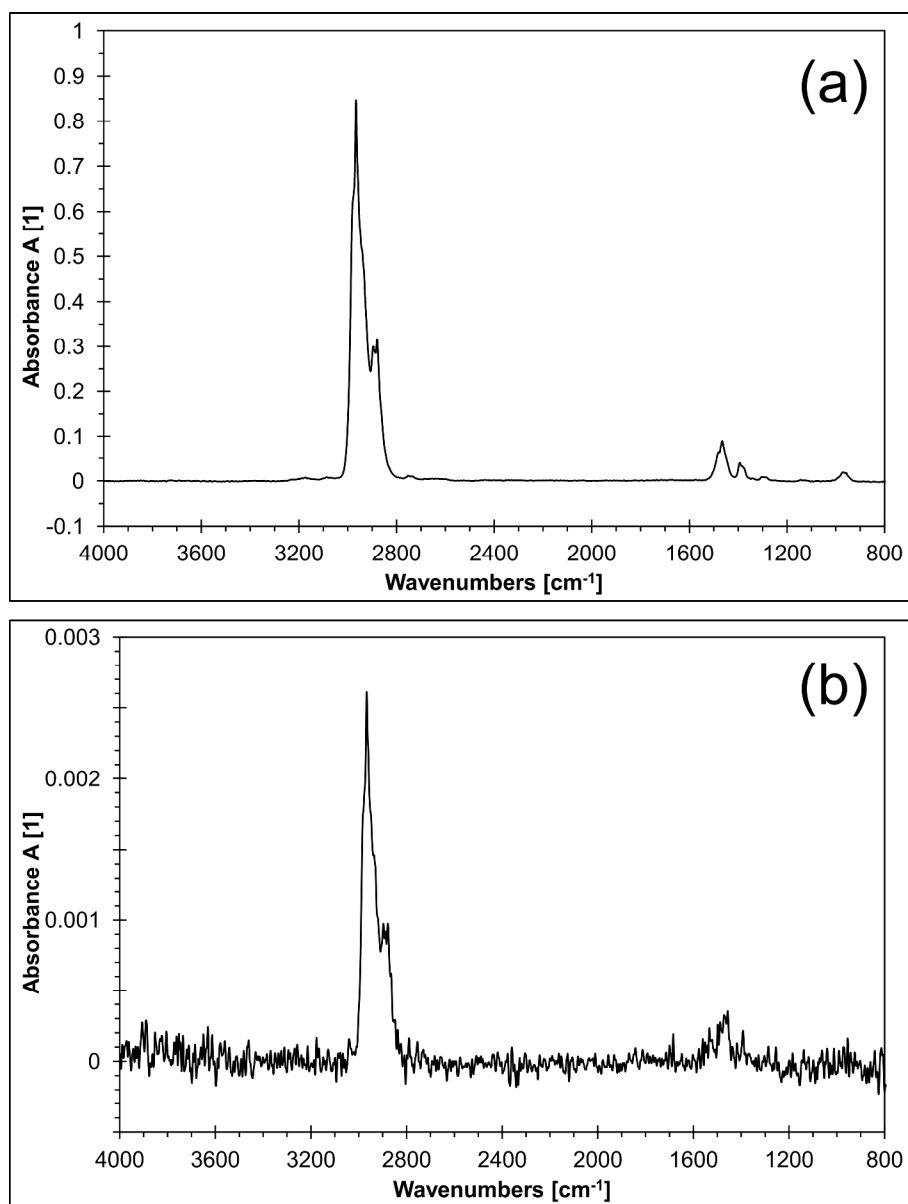

**Figure S-6.** (a) MIR absorption spectrum of butane diluted in N<sub>2</sub> to 5000 ppm<sub>v</sub> obtained with the iHWG MIR sensor; 100 averaged scans. (b) MIR absorption spectrum of butane diluted in N<sub>2</sub> to 20 ppm<sub>v</sub> obtained with the iHWG MIR sensor; 1000 averaged scans.



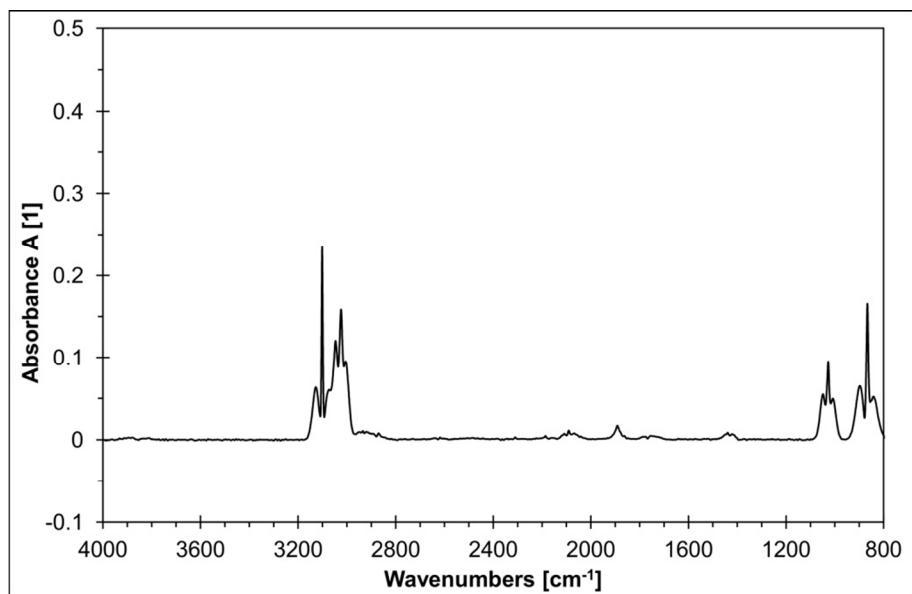

**Figure S-7.** Spectrum of cyclopropane; iHWG, 5000 ppm<sub>v</sub>.

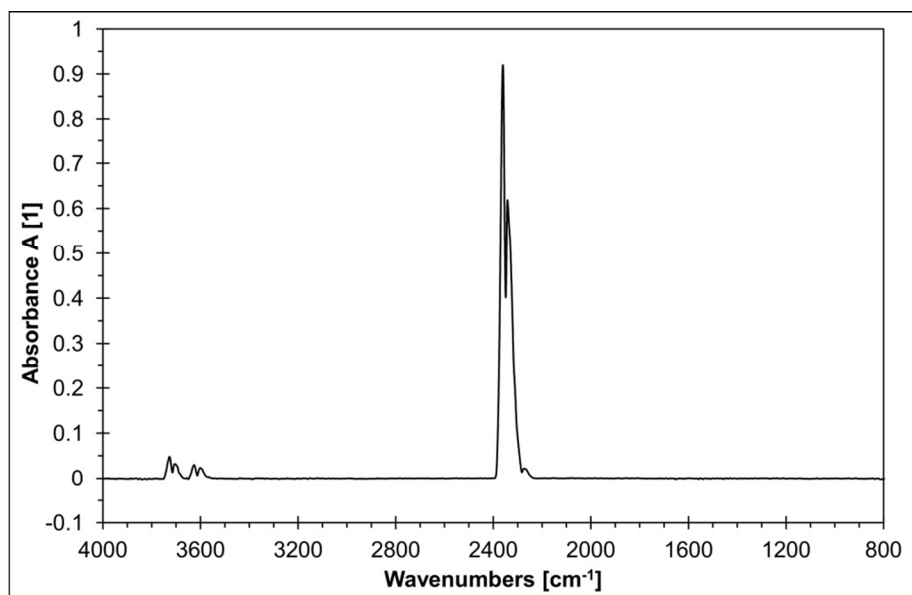

**Figure S-8.** Spectrum of carbon dioxide; iHWG, 5000 ppm<sub>v</sub>.

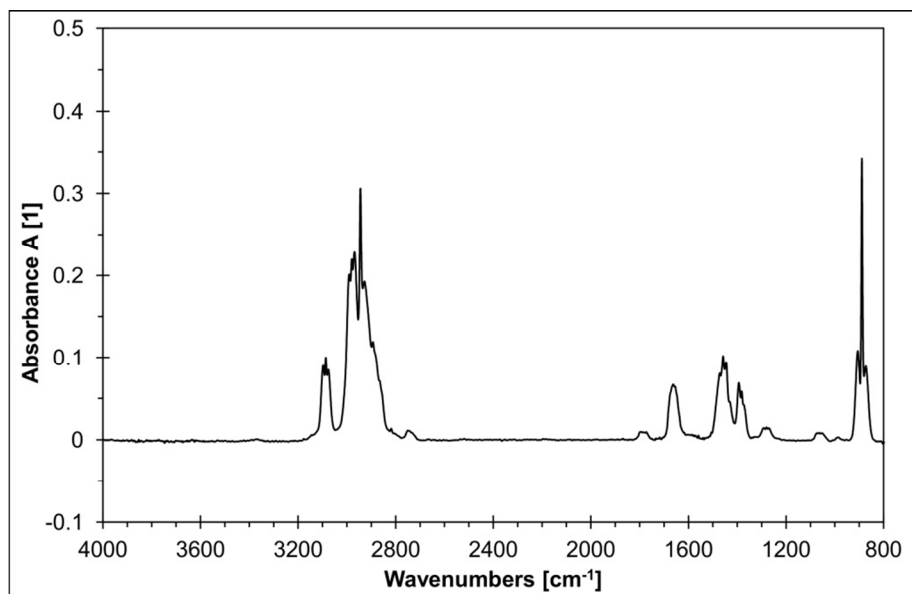

**Figure S-9.** Spectrum of isobutylene; iHWG, 5000 ppm<sub>v</sub>.

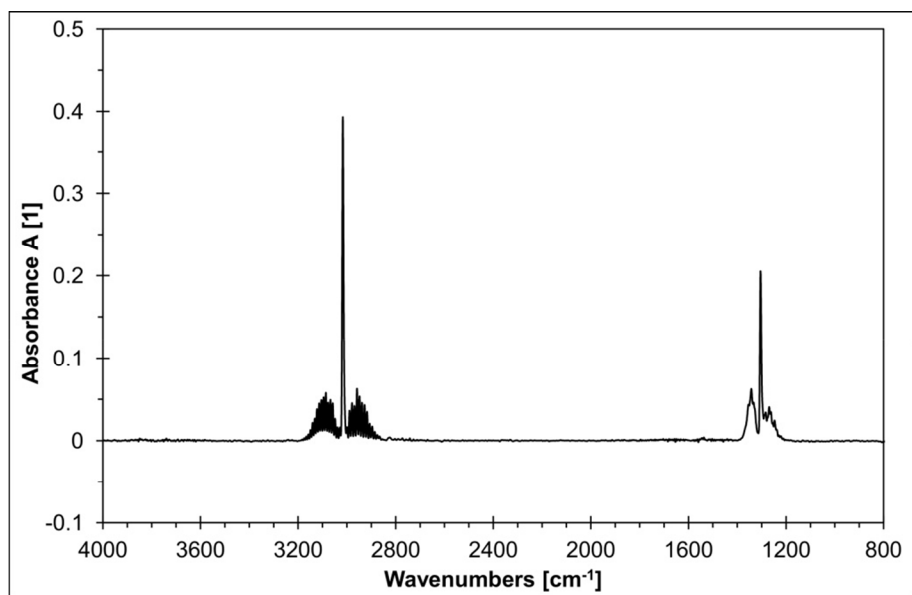

**Figure S-10.** Spectrum of methane; iHWG, 5000 ppm<sub>v</sub>.

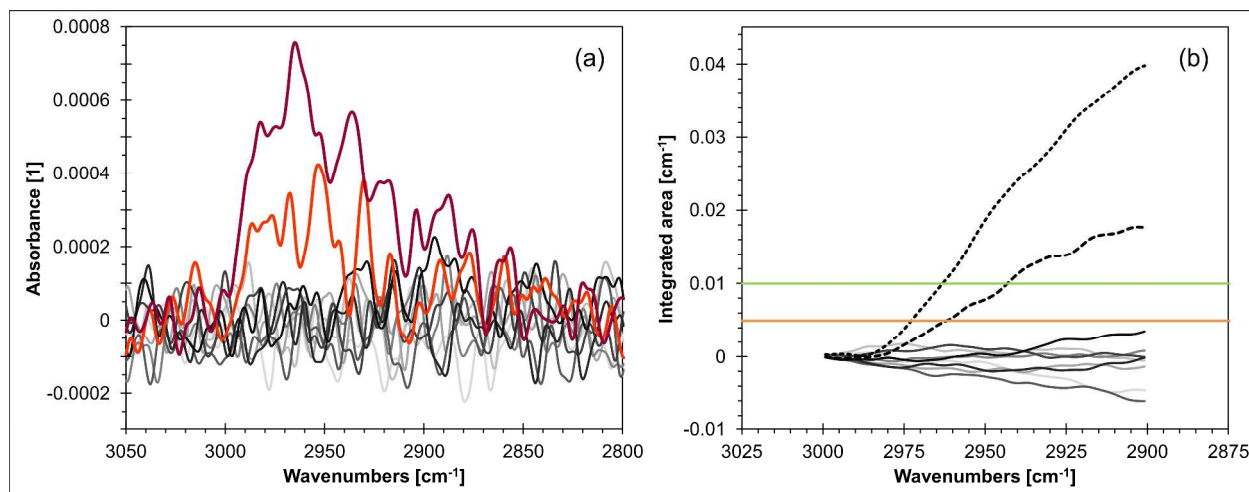

**Figure S-11.** Estimation of the LOD for butane. (a) Butane spectra of 3.3 ppm<sub>v</sub> (red), and 6.7 ppm<sub>v</sub> (purple) vs. 8 blank spectra (grey shades); 1000 averaged scans. (b) Integrated areas of all spectra (blanks = solid lines; 3.3 ppm<sub>v</sub> butane = dashed line; 6.7 ppm<sub>v</sub> butane = dotted line). The horizontal orange line denotes the decision criterion (compare Ref. 57) calculated as 1.65 times the standard deviation of the 8 blanks. The horizontal green line reflects the LOD. Both diagrams confirm that butane at 3.3 ppm<sub>v</sub> may still be discriminated against a blank sample at these measurement conditions.
